# Supplementary material
Source: PubMed Central journal article supplement (PMC2533413)
Supplement: supp_D800031-JLR200_Suppdata.pdf [file supp_D800031-JLR200_Suppdata.pdf]

**Supplementary Table 1.** The proportional lipid composition of subcutaneous and intra-abdominal adipose tissue, the liver, and serum.

|           | SCfat         | IAfat         | Liver                       | Serum                         |
|-----------|---------------|---------------|-----------------------------|-------------------------------|
| Ceramides | 0.025±0.003   | 0.036±0.004   | 0.146±0.029 <sup>‡*</sup>   | 0.123±0.013 <sup>‡‡‡</sup>    |
| SM        | 0.064±0.012   | 0.056±0.007   | 1.15±0.16 <sup>‡*</sup>     | 4.30±0.64 <sup>‡‡‡**</sup>    |
| GPA       | 0.016±0.001   | 0.016±0.002   | 0.262±0.033 <sup>‡*</sup>   | 0.177±0.018 <sup>‡‡‡**</sup>  |
| PC        | 0.314±0.052   | 0.340±0.037   | 18.0±2.39 <sup>‡*</sup>     | 22.71±2.94 <sup>‡‡‡</sup>     |
| PC(e)     | 0.015±0.001   | 0.010±0.001   | 0.135±0.017 <sup>‡*</sup>   | 1.270±0.291 <sup>‡‡‡**</sup>  |
| PE        | 0.149±0.014   | 0.140±0.011   | 3.60±0.39 <sup>‡*</sup>     | 2.62±0.24 <sup>‡‡‡**</sup>    |
| PE(e)     | 0.190±0.021   | 0.192±0.021   | 1.13±0.14 <sup>‡*</sup>     | 2.19±0.27 <sup>‡‡‡**</sup>    |
| LysoTot   | 0.059±0.007   | 0.020±0.006   | 0.127±0.029 <sup>‡‡‡§</sup> | 2.26±0.49 <sup>‡‡‡**</sup>    |
| - LPC     | 0.0032±0.0007 | 0.0031±0.0004 | 0.0524±0.0100 <sup>‡*</sup> | 2.06±0.46 <sup>‡‡‡**</sup>    |
| - LPE     | 0.056±0.006   | 0.047±0.005   | 0.075±0.023                 | 0.133±0.020 <sup>‡‡‡‡**</sup> |
| - LPE(e)  | 0.0053±0.0006 | 0.0046±0.0005 | 0.0078±0.002                | 0.015±0.002 <sup>‡‡‡‡**</sup> |
| DAG       | 0.0096±0.0006 | 0.0087±0.0007 | 0.023±0.003 <sup>‡*</sup>   | 0.022±0.003 <sup>‡‡‡</sup>    |
| TAG       | 99.16±0.11    | 99.15±0.08    | 75.43±3.13 <sup>‡*</sup>    | 61.26±4.88 <sup>‡‡‡**</sup>   |

<sup>‡</sup>, p<0.0001 for one-way ANOVA (SCfat, IAfat, and the liver)

<sup>‡‡</sup>, p<0.05 for one-way ANOVA (SCfat, IAfat, and the liver)

<sup>‡‡‡</sup>, p<0.0001 for one-way ANOVA (SCfat, IAfat, liver, and serum)

<sup>‡‡‡‡</sup>, p<0.01 for one-way ANOVA (SCfat, IAfat, liver, and serum)

<sup>\*</sup>, p<0.0001, LSD post hoc test, liver vs. SCfat and IA fat

<sup>\*\*</sup>, p<0.01, LSD post hoc test, serum vs. liver, SCfat, and IAfat

<sup>†</sup>, p<0.05, LSD post hoc test, SCfat vs. liver

<sup>§</sup>, p<0.001, LSD post hoc test, IAfat vs. liver
